# Supplementary material
Source: publisher site journal article supplement (https://www.dovepress.com/article/277445)
Supplement: Supplementary file 1 [file get_supplementary_file.php]

Appendix

Result 1

**The HPV16 and HPV18 virus infections were detected by PCR method, detected by 2% agarose gel electrophoresis, and exposed to the gel imaging system to record the results. It was found that the tissue samples infected with HPV16/18 virus can be seen neatly and brightly Banding at 268bp, no banding on uninfected tissue samples.** **We have put these two figures in the supplementary material.**

M 1 2 3 4 5 6 7 8 P N


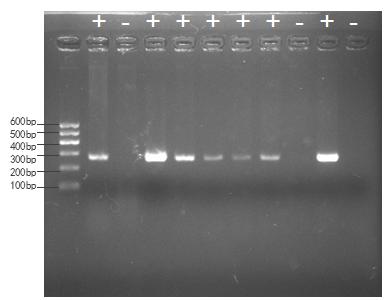


M 1 2 3 4 5 6 7 8 P N


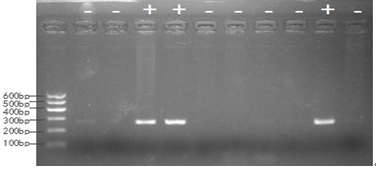


Fig 1 The electrophoresis resluts of HPV16 (Left) and HPV18(Right) infection

M: marker (100-600bp); P: positive control, N: negative control; +: positive;-: negative

Table 1 The details of the 154 cervical tissue samples collected:

| Number | | Name | Age | Type | FIGO | Pathology number | HPV16 | HPV18 |
| --- | --- | --- | --- | --- | --- | --- | --- | --- |
| 1 | 1-WZ | | 42 | Fibroids |  |  | - | - |
| 2 | 2-WZ | | 37 | Endometrial Cancer |  |  | - | - |
| 3 | 3-WZ | | 48 | Fibroids |  |  | - | - |
| 4 | 5-WZ | | 53 | Endometrial polyps |  |  | - | - |
| 5 | 6-WZ | | 56 | Normal |  |  | + | - |
| 6 | 7-WZ | | 35 | Normal |  |  | + | - |
| 7 | 10-WZ | | 49 | Normal |  |  | + | - |
| 8 | 11-WZ | | 55 | Normal |  |  | - | - |
| 9 | 12-WZ | | 50 | Normal |  |  | - | - |
| 10 | 13-WZ | | 42 | Normal |  |  | + | - |
| 11 | K4 | | 38 | Normal | IA |  | - | - |
| 12 | K6 | | 50 | Normal | IA |  | - | - |
| 13 | K7 | | 45 | Normal | IIB |  | - | - |
| 14 | K8 | | 52 | Normal | IIB |  | - | - |
| 15 | K9 | | 55 | Normal | IB | 20101787 | - | - |
| 16 | K10 | | 41 | Normal | IA | 20101944 | - | - |
| 17 | K22 | | 54 | Normal |  |  | - | - |
| 18 | K24 | | 42 | Fibroids |  |  | - | - |
| 19 | K25 | | 42 | Cervicitis |  |  | - | - |
| 20 | K26 | | 37 | Cervicitis |  |  | - | - |
| 21 | K28 | | 56 | Cervicitis |  |  | - | - |
| 22 | K33 | | 46 | Normal |  |  | - | - |
| 23 | LY-18 | | 31 | Cervicitis |  |  | + | - |
| 24 | LY-28 | | 37 | Cervicitis |  |  | + | - |
| 25 | F1 | | 57 | Normal | IIIB | 2011-7978 | - | + |
| 26 | F2 | | 48 | Normal | IB1 | 2011-8848 | - | - |
| 27 | F3 | | 48 | Normal | IB2 | 2011-10623 | - | - |
| 28 | F8 | | 51 | Normal | IIIB | 2012-1696 | - | - |
| 29 | F9 | | 50 | Normal | IB2 | 2012-3907 | - | - |
| 30 | F10 | | 42 | Normal | IB2 | 2012-3632 | - | - |
| 31 | F11 | | 62 | Normal | IB2 | 2012-4740 | - | - |
| 32 | F14 | | 45 | Normal | IB2 | 2012-5356 | - | - |
| 33 | F15 | | 65 | Normal | IIIB | 2012-8022 | - | - |
| 34 | F16 | | 51 | Normal | IB1 | 2012-6717 | - | - |

| 35 | | F17 | | 51 | | Normal | | IB1 | | 2012-10189 | | - | | - | |
| --- | --- | --- | --- | --- | --- | --- | --- | --- | --- | --- | --- | --- | --- | --- | --- |
| 36 | | F18 | | 42 | | Normal | | IB1 | | 2012-10853 | | - | | - | |
| 37 | | F19 | | 55 | | Normal | | IB1 | | 2012-10886 | | - | | - | |
| 38 | | F20 | | 50 | | Normal | | IB1 | | 2012-10889 | | + | | - | |
| 39 | | F21 | | 38 | | Normal | | IIIB | | 2012-10228 | | + | | - | |
| 40 | | F25 | | 48 | | Cervicitis | |  | | 2010-4172 | | - | | - | |
| 41 | | F26 | | 49 | | Cervicitis | |  | | 2010-4196 | | - | | - | |
| 42 | | W7 | | 49 | | Normal | |  | | 14-25211 | | - | | - | |
| 43 | | W8 | | 42 | | Cervicitis | |  | |  | | - | | - | |
| 44 | | W25B | | 49 | | Normal | |  | | 760132 | | - | | - | |
| 45 | | W26B | | 43 | | Normal | |  | | 758293 | | - | | - | |
| 46 | | W30B | | 48 | | Normal | |  | | 738124 | | + | | - | |
| 47 | | W31B | | 63 | | Normal | |  | | 743157 | | - | | - | |
| 48 | | W33B | | 42 | | Normal | |  | | 740492 | | - | | - | |
| 49 | | W34B | | 56 | | Normal | |  | | 744908 | | + | | - | |
| 50 | | W37B | | 33 | | Normal | |  | | 743171 | | - | | - | |
| 51 | | W38B | | 60 | | Normal | |  | | 14113115 | | - | | - | |
| 52 | | 14-WY | | 23 | | CINI | |  | |  | | - | | - | |
| 53 | | 15-WY | | 44 | | CINI | |  | | 20101237 | | - | | - | |
| 54 | | 16-WY | | 48 | | CINI | |  | | 20101238 | | - | | - | |
| 55 | | 18-WY | | 50 | | CINI | |  | | 20101313 | | - | | - | |
| 56 | | 19-WY | | 40 | | CINI | |  | | 20101745 | | - | | - | |
| 57 | | 20-WY | | 45 | | CINI | |  | | 20101941 | | - | | - | |
| 58 | | 21-WY | | 47 | | CINI | |  | |  | | - | | - | |
| 59 | | 22-WY | | 41 | | CINI | |  | |  | | - | | - | |
| 60 | | 23-WY | | 47 | | CINI | |  | | 20103069 | | - | | - | |
| 61 | | 25-WY | | 56 | | CINI | |  | |  | | - | | - | |
| 62 | | K48 | | 42 | | CIN2 | |  | |  | | + | | - | |
| 63 | | LY-6 | | 43 | | CIN2 | |  | |  | | + | | - | |
| 64 | | LY-10 | | 45 | | CIN2 | |  | |  | | + | | - | |
| 65 | | LY-48 | | 46 | | CIN2 | |  | |  | | + | | + | |
| 66 | | Ff6 | | 29 | | CIN2 | |  | |  | | - | | - | |
| 67 | | Ff12 | | 50 | | CIN2 | |  | |  | | - | | - | |
| 68 | | Ff13 | | 38 | | CIN2 | |  | |  | | - | | - | |
| 69 | | Ff14 | | 43 | | CIN2 | |  | |  | | - | | - | |
| 70 | | Ff34 | | 49 | | CIN2 | |  | |  | | - | | - | |
| 71 | | Ff43 | | 45 | | CIN2 | |  | |  | | - | | - | |
| 72 | | Ff55 | | 56 | | CIN2 | |  | |  | | + | | - | |
| 73 | | W1 | | 43 | | CIN2 | |  | |  | | - | | - | |
| 74 | | LY-2 | | 38 | | CIN3 | |  | |  | | + | | - | |
| 75 | | LY-3 | | 30 | | CIN3 | |  | |  | | + | | - | |
| 76 | | LY-7 | | 39 | | CIN3 | |  | |  | | + | | - | |
| 77 | | LY-9 | | 44 | | CIN3 | |  | |  | | + | | + | |
| 78 | | LY-11 | | 43 | | CIN3 | |  | |  | | - | | - | |
| 79 | | LY-12 | | 47 | | CIN3 | |  | |  | | - | | - | |
| 80 | | LY-42 | | 38 | | CIN3 | |  | |  | | + | | + | |
| 81 | | Ff54 | | 40 | | CIN3 | |  | |  | | + | | - | |
| 82 | | Ff56 | | 41 | | CIN3 | |  | |  | | - | | - | |
| 83 | | Ff57 | | 49 | | CIN3 | |  | |  | | - | | - | |
| 84 | | W2 | | 49 | | CIN3 | |  | |  | | - | | - | |
| 85 | | W3 | | 36 | | CIN3 | |  | |  | | + | | - | |
| 86 | | W4 | | 31 | | CIN3 | |  | |  | | - | | - | |
| 87 | | 27-WC | | 45 | | Cancer | | IIA | |  | | + | | - | |
| 88 | | 28-WC | | 56 | | Cancer | | ＩB2 | |  | | + | | - | |
| 89 | | 29-WC | | 35 | | Cancer | | ＩB2 | |  | | + | | - | |
| 90 | | 31-WC | | 42 | | Cancer | | ⅠA | | 2010-1944 | | - | | - | |
| 91 | | 33-WC | | 42 | | Cancer | | ⅠB | | 2010-2710 | | - | | - | |
| 92 | | 34-WC | | 47 | | Cancer | | ⅠB | | 2010-2862 | | - | | - | |
| 93 | | 36-WC | | 52 | | Cancer | | ⅠB | | 2010-3101 | | - | | - | |
| 94 | | 37-WC | | 38 | | Cancer | | IIA | |  | | - | | - | |
| 95 | | 38-WC | | 46 | | Cancer | | IA | |  | | - | | - | |
| 96 | | 41-WC | | 52 | | Cancer | | IB | |  | | + | | - | |
| 97 | | 42-WC | | 54 | | Cancer | | IA | |  | | + | | + | |
| 98 | | 43-WC | | 49 | | Cancer | | IA | |  | | + | | - | |
| 99 | | 44-WC | | 60 | | Cancer | | B2期 | |  | | - | | - | |
| 100 | | 45-WC | | 50 | | Cancer | | B2期 | |  | | - | | - | |
| 101 | | 47-WC | | 37 | | Squamous cell carcinoma | | IA | |  | | + | | + | |
| 102 | | 48-WC | | 68 | | Cancer | | IIB | |  | | + | | - | |
| 103 | | 49-WC | | 41 | | Squamous cell carcinoma | | IB | |  | | + | | - | |
| 104 | | 50-WC | | 42 | | Squamous cell carcinoma | | IA | |  | | + | | - | |
| 105 | | 51-WZ6a | | 45 | | Cancer | | IB | |  | | - | | - | |
| 106 | | 52-WC6β | | 48 | | Cancer | | IIA | |  | | + | | - | |
| 107 | | 54-WC | | 50 | | Cancer | | IA | |  | | - | | - | |
| 108 | | K1 | | 52 | | Cancer | | IA | |  | | + | | - | |
| 109 | | K5 | | 60 | | Cancer | | IA | |  | | + | | - | |
| 110 | | K11 | | 65 | | Cancer | | IB | | 20102328 | | - | | - | |
| 111 | | K12 | | 54 | | Cancer | | IB | | 20102710 | | - | | - | |
| 112 | | K13 | | 41 | | Cancer | | IB | | 20102862 | | + | | - | |
| 113 | | K16 | | 39 | | Cancer | | IA | |  | | + | | - | |
| 114 | | K17 | | 48 | | Cancer | | IIA | |  | | + | | - | |
| 115 | | K18 | | 47 | | Cancer | | IB | |  | | + | | - | |
| 116 | | K19 | | 60 | | Cancer | | IA | |  | | + | | - | |
| 117 | | K20 | | 45 | | Cancer | | IIB | |  | | + | | - | |

| 118 | K21 | 41 | Cancer | IIA |  | + | - |
| --- | --- | --- | --- | --- | --- | --- | --- |
| 119 | K32 | 38 | Cancer | IA |  | + | - |
| 120 | LY-19 | 73 | Cancer | IB |  | + | - |
| 121 | LY-20 | 40 | Cancer | IA |  | + | + |
| 122 | LY-21 | 45 | Cancer | III |  | + | - |
| 123 | LY-22 | 51 | Cancer | IA |  | + | + |
| 124 | LY-23 | 73 | Cancer | IIA |  | - | - |
| 125 | LY-26 | 53 | Cancer | IA |  | + | + |
| 126 | LY-45 | 55 | Cancer | IB |  | + | - |
| 127 | F1 | 57 | Cancer | IB | 2011-7978 | + | + |
| 128 | F2 | 48 | Cancer | III | 2011-8848 | - | - |
| 129 | F4 | 52 | Cancer | IB2 | 2011-10757 | - | - |
| 130 | F6 | 37 | Cancer | IB2 | 2012-66 | + | - |
| 131 | F7 | 57 | Cancer | IIIB | 2012-221 | + | - |
| 132 | F8 | 51 | Cancer | IIIB | 2012-1696 | + | - |
| 133 | F9 | 50 | Cancer | IB2 | 2012-3907 | + | - |
| 134 | F12 | 41 | Cancer | IIIB | 2012-5194 | + | - |
| 135 | F14 | 45 | Cancer | IB2 | 2012-5356 | + | - |
| 136 | F24 | 65 | Squamous cell carcinoma | IB | 2010-4088 | + | - |
| 137 | Ff19 | 55 | Squamous cell carcinoma | IIB |  | + | + |
| 138 | Ff26 | 45 | Cancer | IA |  | + | + |
| 139 | 4 | 42 | Cancer | IIb |  | - | - |
| 140 | W6 | 49 | Cancer | IA | 14-25211 | - | + |
| 141 | W25 | 49 | Cancer | II | 760132 | + | - |
| 142 | W26 | 43 | Cancer | II | 758293 | + | - |
| 143 | W27 | 28 | Squamous cell carcinoma | III | 736585 | + | - |
| 144 | W28 | 51 | Cancer | I | 738666 | + | - |
| 145 | W29 | 40 | Cancer | I | 735703 | + | - |
| 146 | W30 | 48 | Squamous cell carcinoma | I | 738124 | + | - |
| 147 | W31 | 63 | Squamous cell carcinoma | III | 743157 | - | - |
| 148 | W32 | 47 | Cancer | II | 755963 | - | - |
| 149 | W33 | 42 | Squamous cell carcinoma | I | 740492 | - | - |
| 150 | W34 | 56 | Squamous cell carcinoma | II | 744908 | + | - |
| 151 | W35 | 34 | Squamous cell carcinoma | I | 743140 | - | - |
| 152 | W36 | 58 | Cancer | I | 760579 | - | - |
| 153 | W37 | 33 | Cancer | I | 743171 | - | - |
| 154 | W38 | 60 | Cancer | III | 14113115 | - | - |
